# Supplementary material for: Cells grown in three-dimensional spheroids mirror in vivo metabolic response of epithelial cells
Source: PubMed Central journal article supplement (PMC7237469; doi:10.1038/s42003-020-0973-6), 2020-05-19
Supplement: 42003_2020_973_MOESM2_ESM.pdf [file 42003_2020_973_MOESM2_ESM.pdf]

## Description of Additional Supplementary Items

**File name:** Supplementary Table 1

**Description:** Sequences of qPCR primers

**File name:** Supplementary Data 1

**Description:** All the source data of blot figures presented in the main and supplementary figures

**File name:** Supplementary Data 2

**Description:** Measured metabolites from 2D/3D cell lysates

**File name:** Supplementary Data 3

**Description:** Measured excreted metabolites from 2D/3D cell lysates

**File name:** Supplementary Data 4

**Description:** Measured metabolites from 2D/3D/kidney/nephron lysates

**File name:** Supplementary Data 5

**Description:** Measured lipids from 2D/3D/kidney/nephron lysates

**File name:** Supplementary Data 6

**Description:** Statistics on metabolites from 2D/3D cell lysates

**File name:** Supplementary Data 7

**Description:** Statistics on excreted metabolites from 2D/3D cell lysates

**File name:** Supplementary Data 8

**Description:** Statistics on metabolites from 2D/3D/kidney/nephron lysates

**File name:** Supplementary Data 9

**Description:** Statistics on lipids from 2D/3D/kidney/nephron lysates
