# Supplementary material for: Cells grown in three-dimensional spheroids mirror in vivo metabolic response of epithelial cells
Source: PubMed Central journal article supplement (PMC7237469; doi:10.1038/s42003-020-0973-6), 2020-05-19
Supplement: 42003_2020_973_MOESM13_ESM.pdf [file 42003_2020_973_MOESM13_ESM.pdf]

## Reporting Summary

Nature Research wishes to improve the reproducibility of the work that we publish. This form provides structure for consistency and transparency in reporting. For further information on Nature Research policies, see [Authors & Referees](#) and the [Editorial Policy Checklist](#).

### Statistics

For all statistical analyses, confirm that the following items are present in the figure legend, table legend, main text, or Methods section.

n/a Confirmed

- |                                     |                                     |                                                                                                                                                                                                                                                            |
|-------------------------------------|-------------------------------------|------------------------------------------------------------------------------------------------------------------------------------------------------------------------------------------------------------------------------------------------------------|
| <input type="checkbox"/>            | <input checked="" type="checkbox"/> | The exact sample size ( $n$ ) for each experimental group/condition, given as a discrete number and unit of measurement                                                                                                                                    |
| <input type="checkbox"/>            | <input checked="" type="checkbox"/> | A statement on whether measurements were taken from distinct samples or whether the same sample was measured repeatedly                                                                                                                                    |
| <input type="checkbox"/>            | <input checked="" type="checkbox"/> | The statistical test(s) used AND whether they are one- or two-sided<br><i>Only common tests should be described solely by name; describe more complex techniques in the Methods section.</i>                                                               |
| <input checked="" type="checkbox"/> | <input type="checkbox"/>            | A description of all covariates tested                                                                                                                                                                                                                     |
| <input type="checkbox"/>            | <input checked="" type="checkbox"/> | A description of any assumptions or corrections, such as tests of normality and adjustment for multiple comparisons                                                                                                                                        |
| <input type="checkbox"/>            | <input checked="" type="checkbox"/> | A full description of the statistical parameters including central tendency (e.g. means) or other basic estimates (e.g. regression coefficient) AND variation (e.g. standard deviation) or associated estimates of uncertainty (e.g. confidence intervals) |
| <input checked="" type="checkbox"/> | <input type="checkbox"/>            | For null hypothesis testing, the test statistic (e.g. $F$ , $t$ , $r$ ) with confidence intervals, effect sizes, degrees of freedom and $P$ value noted<br><i>Give <math>P</math> values as exact values whenever suitable.</i>                            |
| <input checked="" type="checkbox"/> | <input type="checkbox"/>            | For Bayesian analysis, information on the choice of priors and Markov chain Monte Carlo settings                                                                                                                                                           |
| <input checked="" type="checkbox"/> | <input type="checkbox"/>            | For hierarchical and complex designs, identification of the appropriate level for tests and full reporting of outcomes                                                                                                                                     |
| <input checked="" type="checkbox"/> | <input type="checkbox"/>            | Estimates of effect sizes (e.g. Cohen's $d$ , Pearson's $r$ ), indicating how they were calculated                                                                                                                                                         |

*Our web collection on [statistics for biologists](#) contains articles on many of the points above.*

### Software and code

Policy information about [availability of computer code](#)

Data collection

Flow cytometry: Beckton Dickinson Diva  
Microscopy: ZEISS ZEN blue software  
qPCR: Bio Rad CFX Manager

Data analysis

Analysis of MS data: ProgenesisQI  
Analysis of MS data: MetaboAnalyst 4.0  
Analysis of qPCR Data: Bio Rad software  
Analysis of FACS Data: FlowJo

For manuscripts utilizing custom algorithms or software that are central to the research but not yet described in published literature, software must be made available to editors/reviewers. We strongly encourage code deposition in a community repository (e.g. GitHub). See the Nature Research [guidelines for submitting code & software](#) for further information.

### Data

Policy information about [availability of data](#)

All manuscripts must include a [data availability statement](#). This statement should provide the following information, where applicable:

- Accession codes, unique identifiers, or web links for publicly available datasets
- A list of figures that have associated raw data
- A description of any restrictions on data availability

All data generated or analysed during this study are included in this published article (and its supplementary information files).

## Field-specific reporting

Please select the one below that is the best fit for your research. If you are not sure, read the appropriate sections before making your selection.

Life sciences       Behavioural & social sciences       Ecological, evolutionary & environmental sciences

For a reference copy of the document with all sections, see [nature.com/documents/nr-reporting-summary-flat.pdf](https://www.nature.com/documents/nr-reporting-summary-flat.pdf)

## Life sciences study design

All studies must disclose on these points even when the disclosure is negative.

|                 |                                                                                                                                              |
|-----------------|----------------------------------------------------------------------------------------------------------------------------------------------|
| Sample size     | Sample size was set to n=4 due to the best practice in the laboratory where the measurements were conducted.                                 |
| Data exclusions | No data has been excluded.                                                                                                                   |
| Replication     | qPCR measurements and sample preparation has been repeated in 3 independent experiments.                                                     |
| Randomization   | Randomization was not relevant to this study                                                                                                 |
| Blinding        | The first author was entirely blinded on all the samples that were measured. The blinding of the samples was conducted by the senior author. |

## Reporting for specific materials, systems and methods

We require information from authors about some types of materials, experimental systems and methods used in many studies. Here, indicate whether each material, system or method listed is relevant to your study. If you are not sure if a list item applies to your research, read the appropriate section before selecting a response.

### Materials & experimental systems

| n/a                                 | Involvement in the study                                        |
|-------------------------------------|-----------------------------------------------------------------|
| <input type="checkbox"/>            | <input checked="" type="checkbox"/> Antibodies                  |
| <input type="checkbox"/>            | <input checked="" type="checkbox"/> Eukaryotic cell lines       |
| <input checked="" type="checkbox"/> | <input type="checkbox"/> Palaeontology                          |
| <input type="checkbox"/>            | <input checked="" type="checkbox"/> Animals and other organisms |
| <input checked="" type="checkbox"/> | <input type="checkbox"/> Human research participants            |
| <input checked="" type="checkbox"/> | <input type="checkbox"/> Clinical data                          |

### Methods

| n/a                                 | Involvement in the study                           |
|-------------------------------------|----------------------------------------------------|
| <input checked="" type="checkbox"/> | <input type="checkbox"/> ChIP-seq                  |
| <input type="checkbox"/>            | <input checked="" type="checkbox"/> Flow cytometry |
| <input checked="" type="checkbox"/> | <input type="checkbox"/> MRI-based neuroimaging    |

## Antibodies

|                 |                                                                                                                                                                                                                                                                                                                                                                                       |
|-----------------|---------------------------------------------------------------------------------------------------------------------------------------------------------------------------------------------------------------------------------------------------------------------------------------------------------------------------------------------------------------------------------------|
| Antibodies used | Ki67: Santa Cruz sc7846, lot#L2104<br>p-Histone3: BD Alexa Fluor 647 rat anti Histone H3C (pS28), Clone: HTA28, Cat#558217, Lot#7172813<br>Hexokinase 2: Cell signaling (C64G5), Cat#2867S Lot#5<br>Bgt1: ab200676, Lot#GR3203423-2<br>PCYT2: ab15053, Lot#GR308764-2<br>Actin: MP Biochemicals, #69100, Dilution 1:20.000<br>Tubulin: Bio Rad, MCA77G<br>GAPDH: Cell signaling #5174 |
| Validation      | Ki67 and p-Histone3: Peintner et al 2015<br>Hexokinase 2: Kshatry et al 2019<br>Bgt1: Ren et al 2019<br>PCYT2: No published validation so far<br>Actin, Tubulin and GAPDH: Haun et al 2018                                                                                                                                                                                            |

## Eukaryotic cell lines

Policy information about [cell lines](#)

|                     |                                                            |
|---------------------|------------------------------------------------------------|
| Cell line source(s) | All cell lines were initially purchased from ATCC CRL-2123 |
|---------------------|------------------------------------------------------------|

|                                                                      |                                                                                                         |
|----------------------------------------------------------------------|---------------------------------------------------------------------------------------------------------|
| Authentication                                                       | Leibniz Institute, Deutsche Sammlung von Mikroorganismen und Zellkulturen GmbH, Germany                 |
| Mycoplasma contamination                                             | The mIMCD3 cells were tested negative for mycoplasma contamination (performed by PCR in our laboratory) |
| Commonly misidentified lines<br>(See <a href="#">ICLAC</a> register) | n/a                                                                                                     |

## Animals and other organisms

Policy information about [studies involving animals](#); [ARRIVE guidelines](#) recommended for reporting animal research

|                         |                                                                                                                                                                                                                    |
|-------------------------|--------------------------------------------------------------------------------------------------------------------------------------------------------------------------------------------------------------------|
| Laboratory animals      | Mus musculus, C57BL/6N, females, 6-8 weeks old                                                                                                                                                                     |
| Wild animals            | Study did not involve wild animals                                                                                                                                                                                 |
| Field-collected samples | Study did not involve Field-collected samples                                                                                                                                                                      |
| Ethics oversight        | No ethical approval was necessary for the study; The permission to extract organs without previous treatment of the animal was granted by the Regierungspräsidium Freiburg to the Laboratory of the senior author. |

Note that full information on the approval of the study protocol must also be provided in the manuscript.

## Flow Cytometry

### Plots

Confirm that:

- The axis labels state the marker and fluorochrome used (e.g. CD4-FITC).
- The axis scales are clearly visible. Include numbers along axes only for bottom left plot of group (a 'group' is an analysis of identical markers).
- All plots are contour plots with outliers or pseudocolor plots.
- A numerical value for number of cells or percentage (with statistics) is provided.

### Methodology

|                           |                                                                                                                                                                                                                                                                |
|---------------------------|----------------------------------------------------------------------------------------------------------------------------------------------------------------------------------------------------------------------------------------------------------------|
| Sample preparation        | Detailed description of the sample preparation is listed in the method section of the manuscript.                                                                                                                                                              |
| Instrument                | Beckton Dickinson LSRII                                                                                                                                                                                                                                        |
| Software                  | Beckton Dickinson DIVA for recording;<br>FlowJo for analysis                                                                                                                                                                                                   |
| Cell population abundance | n/a                                                                                                                                                                                                                                                            |
| Gating strategy           | Selecting living cells in FSC/SSC, gating on single cells in FSC-A/FCS-W, then histogram on 7AAD to discriminate between G1, S and G2/M phase, blot 7AAD against pHiston3-APC to visualize M-Phase cells, blot 7AAD against Ki67-FITC to measure Sub-G1 cells. |

- Tick this box to confirm that a figure exemplifying the gating strategy is provided in the Supplementary Information.
